# Supplementary material for: Novel optically active helical poly(N-propargylthiourea)s: synthesis, characterization and complexing ability toward Fe(iii) ions
Source: Royal Society of Chemistry journal article supplement (doi:10.1039/c1py00457c), 2011-01-01
Supplement: c1py00457c.pdf [file c1py00457c.pdf]

## Supporting Information

### Novel Optically Active Helical Poly(*N*-propargylthiourea)s: Synthesis, Characterization and Complexing Ability toward Fe(III) Ions

Ci Song, Lei Li, Fangjie Wang, Jianping Deng\*, Wantai Yang\*

State Key Laboratory of Chemical Resource Engineering, College of Materials  
Science and Engineering, Beijing University of Chemical Technology, Beijing 100029,  
China

Tel: +86-10-6443-5128; Fax: +86-10-6443-5128

E-mail: dengjp@mail.buct.edu.cn; yangwt@mail.buct.edu.cn

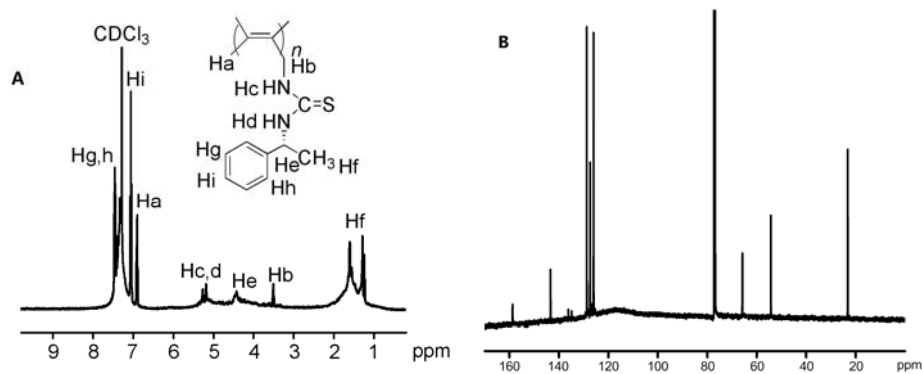

**Fig. S1.** (A)  $^1\text{H}$  and (B)  $^{13}\text{C}$  NMR spectra of poly(**1**) measured in  $\text{CDCl}_3$  at  $20\text{ }^\circ\text{C}$

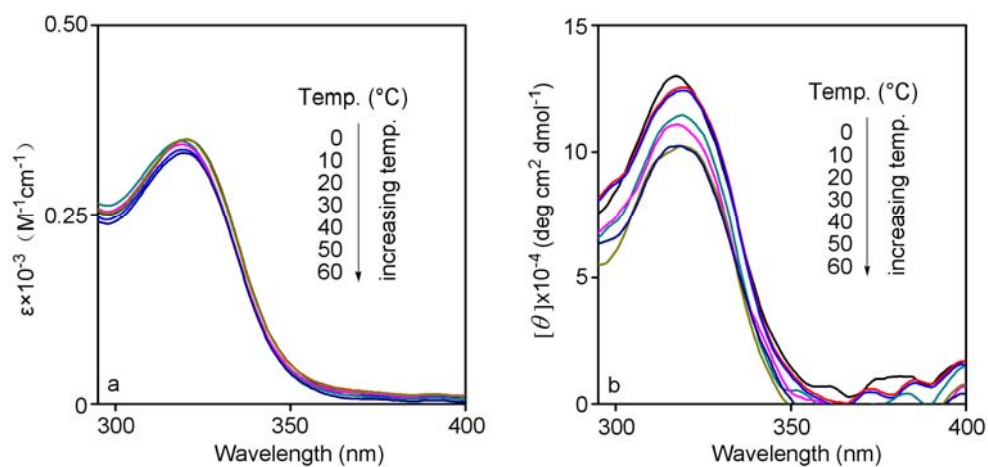

**Fig. S2.** Temperature dependence of UV-vis absorption (a) and CD spectra (b) of poly1 ( $c = 0.1 \text{ mM}$ ,  $\text{CHCl}_3$ )

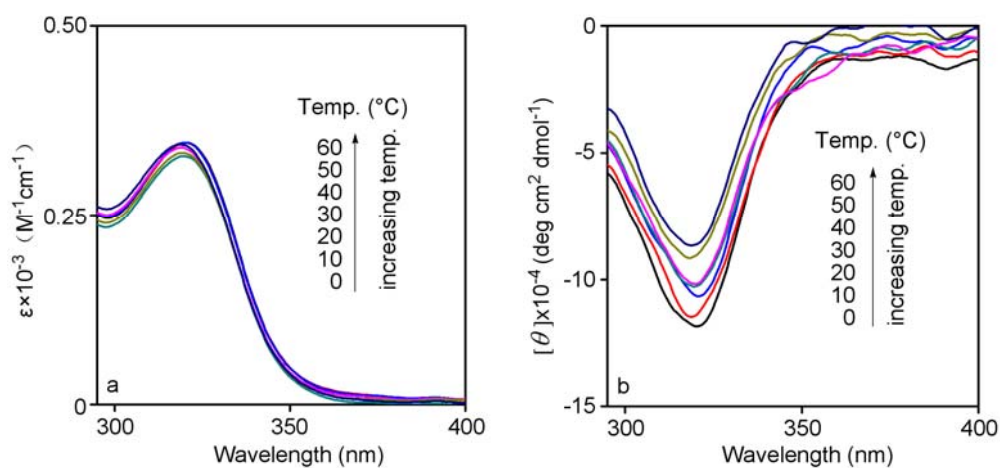

**Fig. S3.** Temperature dependence of UV-vis absorption (a) and CD spectra (b) of poly2 ( $c = 0.1 \text{ mM}$ ,  $\text{CHCl}_3$ )
